# Supplementary figures and images for: Porcine-derived pancreatic enzyme replacement therapy may be linked to chronic hepatitis E virus infection in cystic fibrosis lung transplant recipients
Source: PubMed Central journal article supplement — Gut. 2024 Apr 15;73(10):1702–11. doi: 10.1136/gutjnl-2023-330602 (PMC11420761; doi:10.1136/gutjnl-2023-330602), 2024-04-15

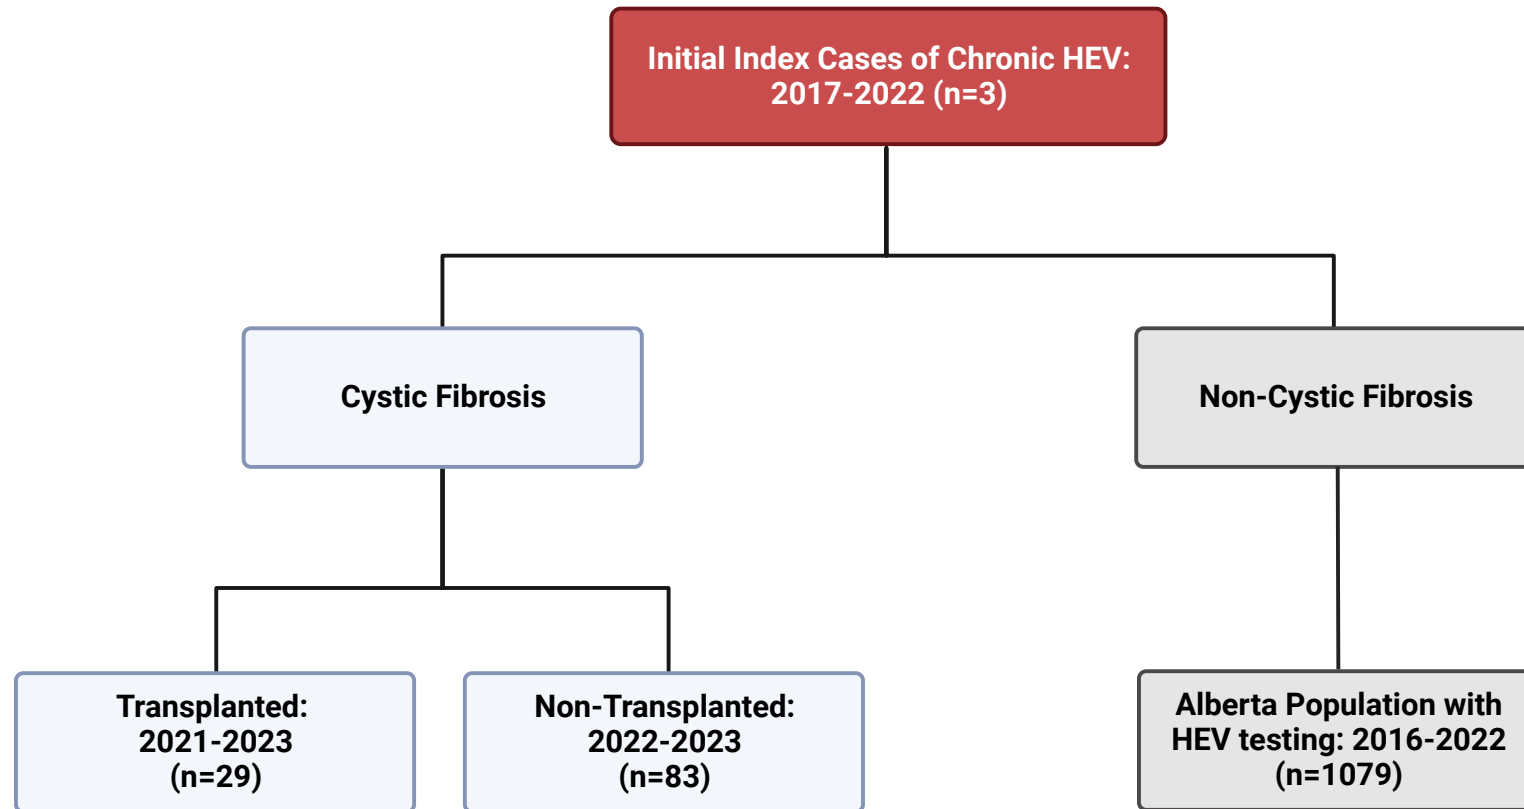

Supplement: gutjnl-2023-330602supp001.pdf [file gutjnl-2023-330602supp001.pdf]

— AST — ALT — Bilirubin Total — GGT — ALP — Viral Load

### Case 1

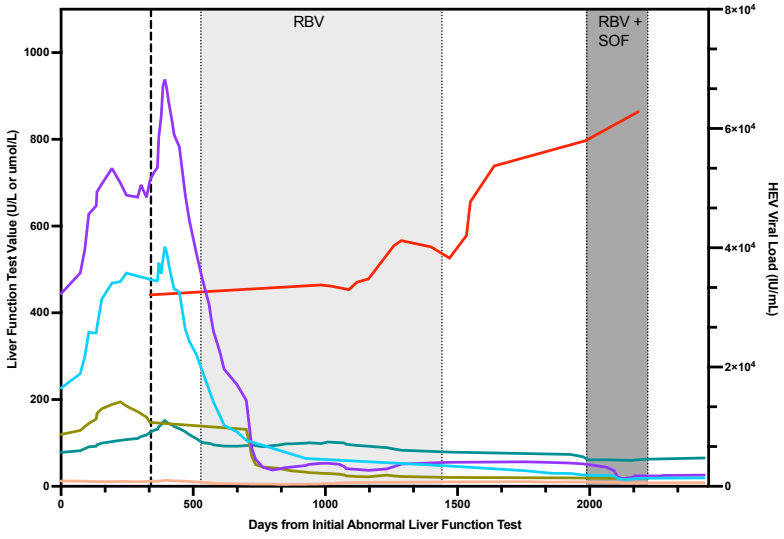

### Case 2

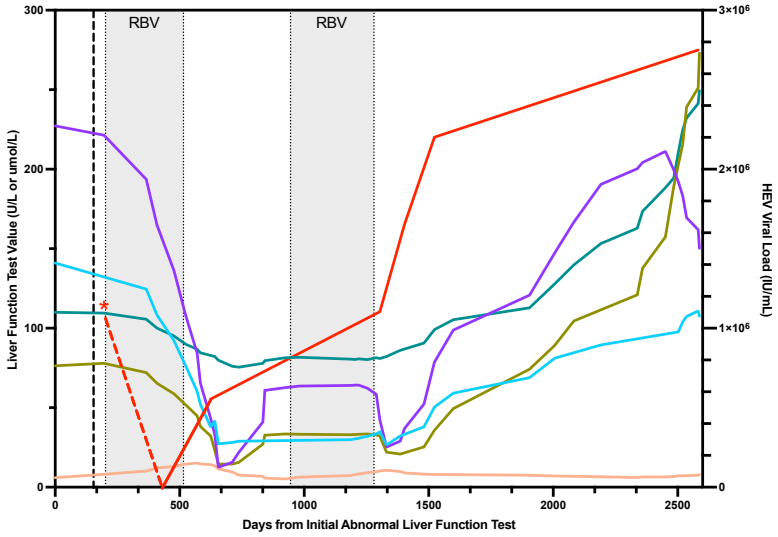

### Case 3

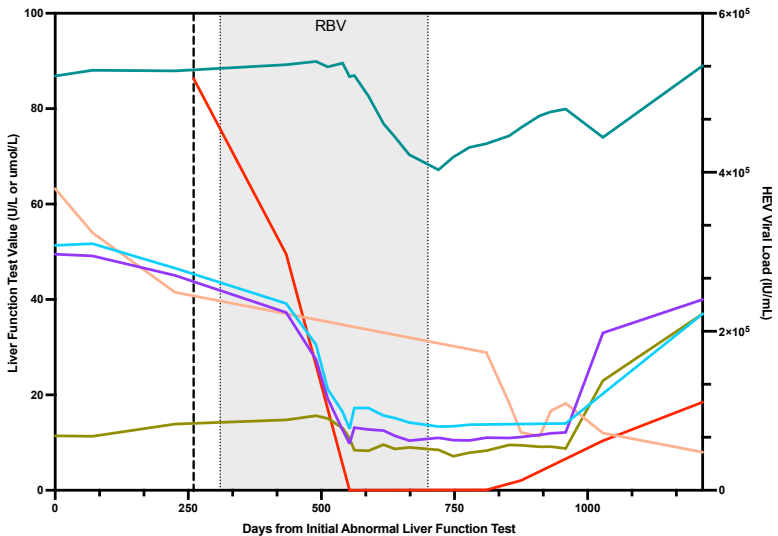

Supplement: gutjnl-2023-330602supp003.pdf [file gutjnl-2023-330602supp003.pdf]

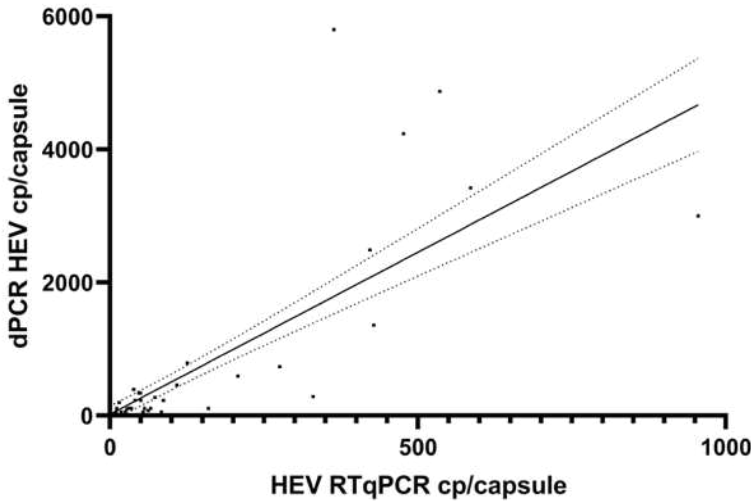

Supplement: gutjnl-2023-330602supp004.pdf [file gutjnl-2023-330602supp004.pdf]
