# Supplementary figures and images for: Porcine-derived pancreatic enzyme replacement therapy may be linked to chronic hepatitis E virus infection in cystic fibrosis lung transplant recipients
Source: HighWire-hosted journal article supplement (doi:10.1136/gutjnl-2023-330602), 2024-04-15

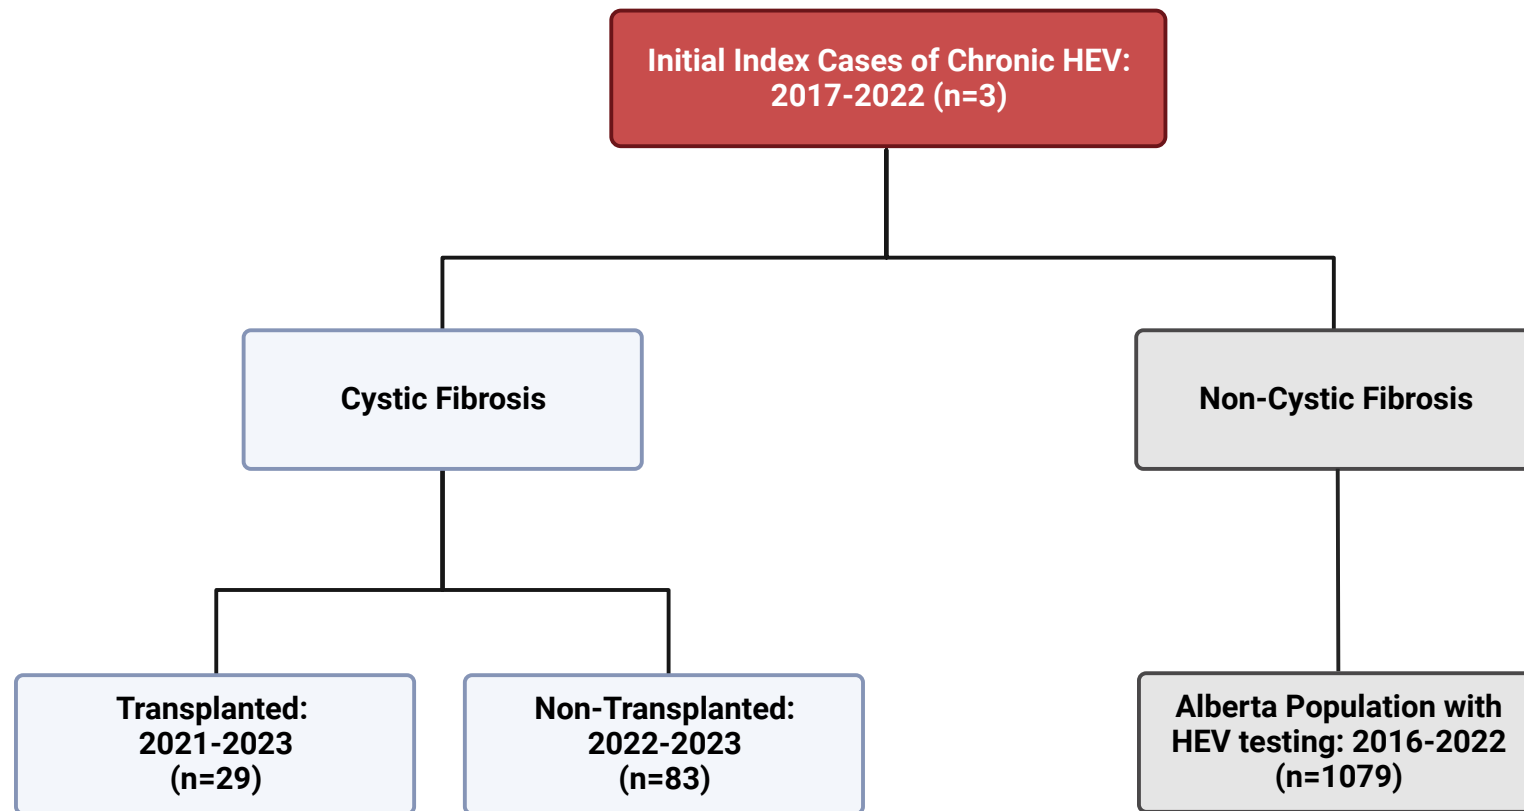

Supplement: gutjnl-2023-330602supp001_data_supplement.pdf [file gutjnl-2023-330602supp001_data_supplement.pdf]

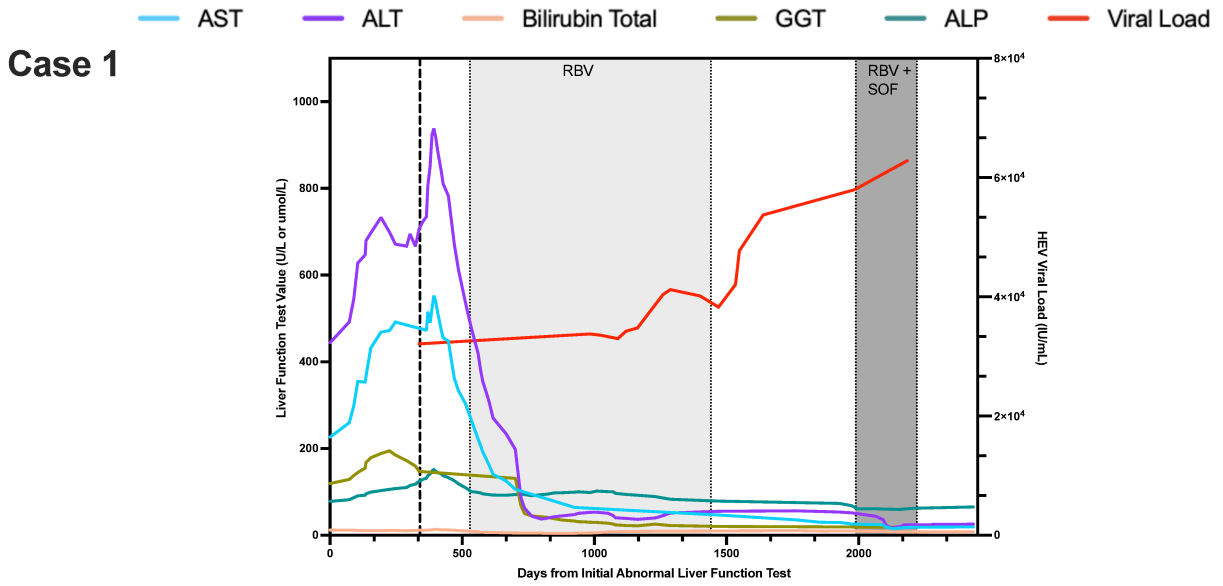

## Case 2

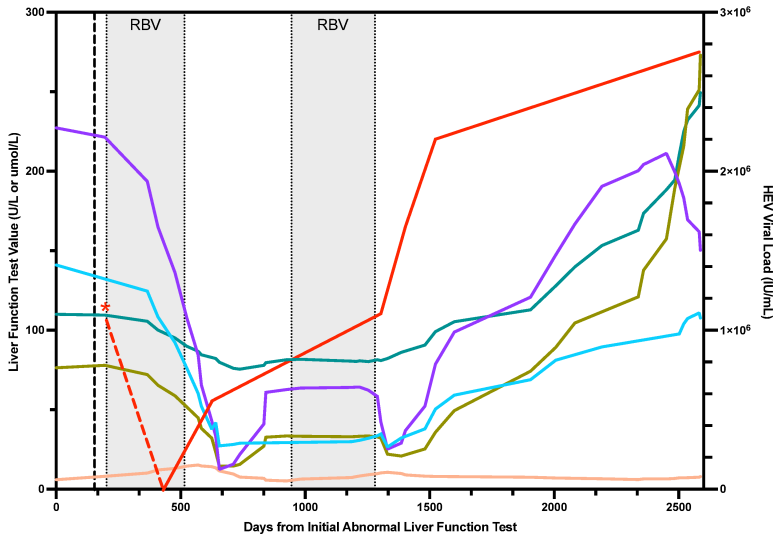

## Case 3

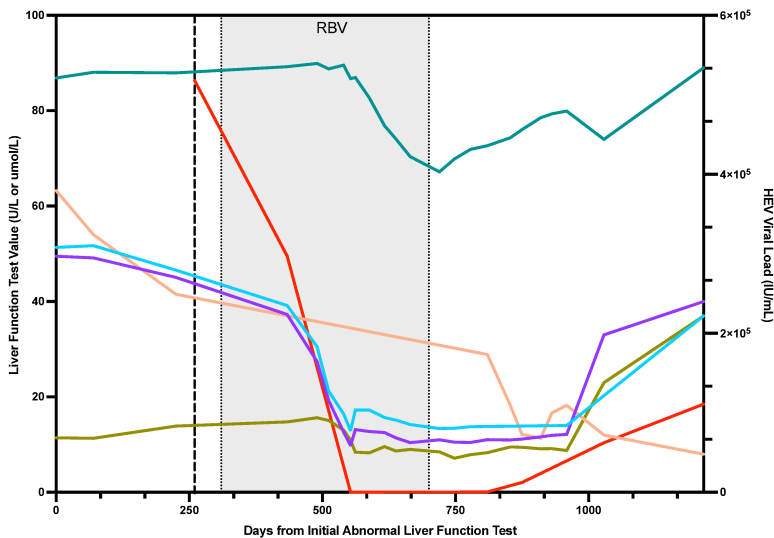

Supplement: gutjnl-2023-330602supp003_data_supplement.pdf [file gutjnl-2023-330602supp003_data_supplement.pdf]

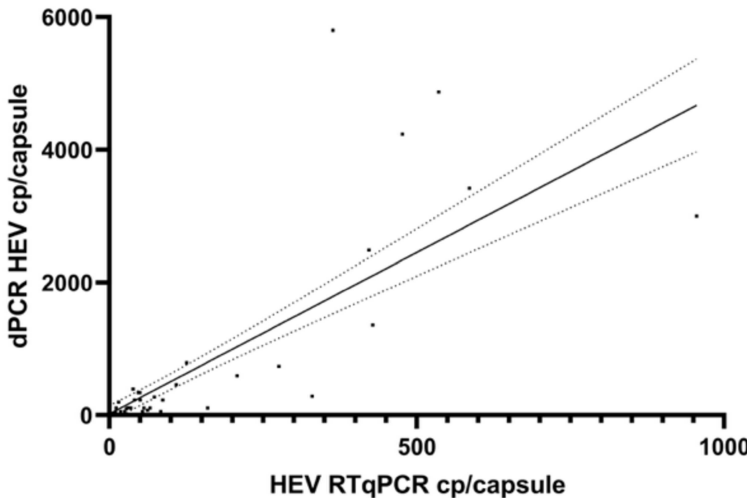

Supplement: gutjnl-2023-330602supp004_data_supplement.pdf [file gutjnl-2023-330602supp004_data_supplement.pdf]
